# Supplementary material
Source: PubMed Central journal article supplement (PMC2702531)

## Supplemental Fig. 1

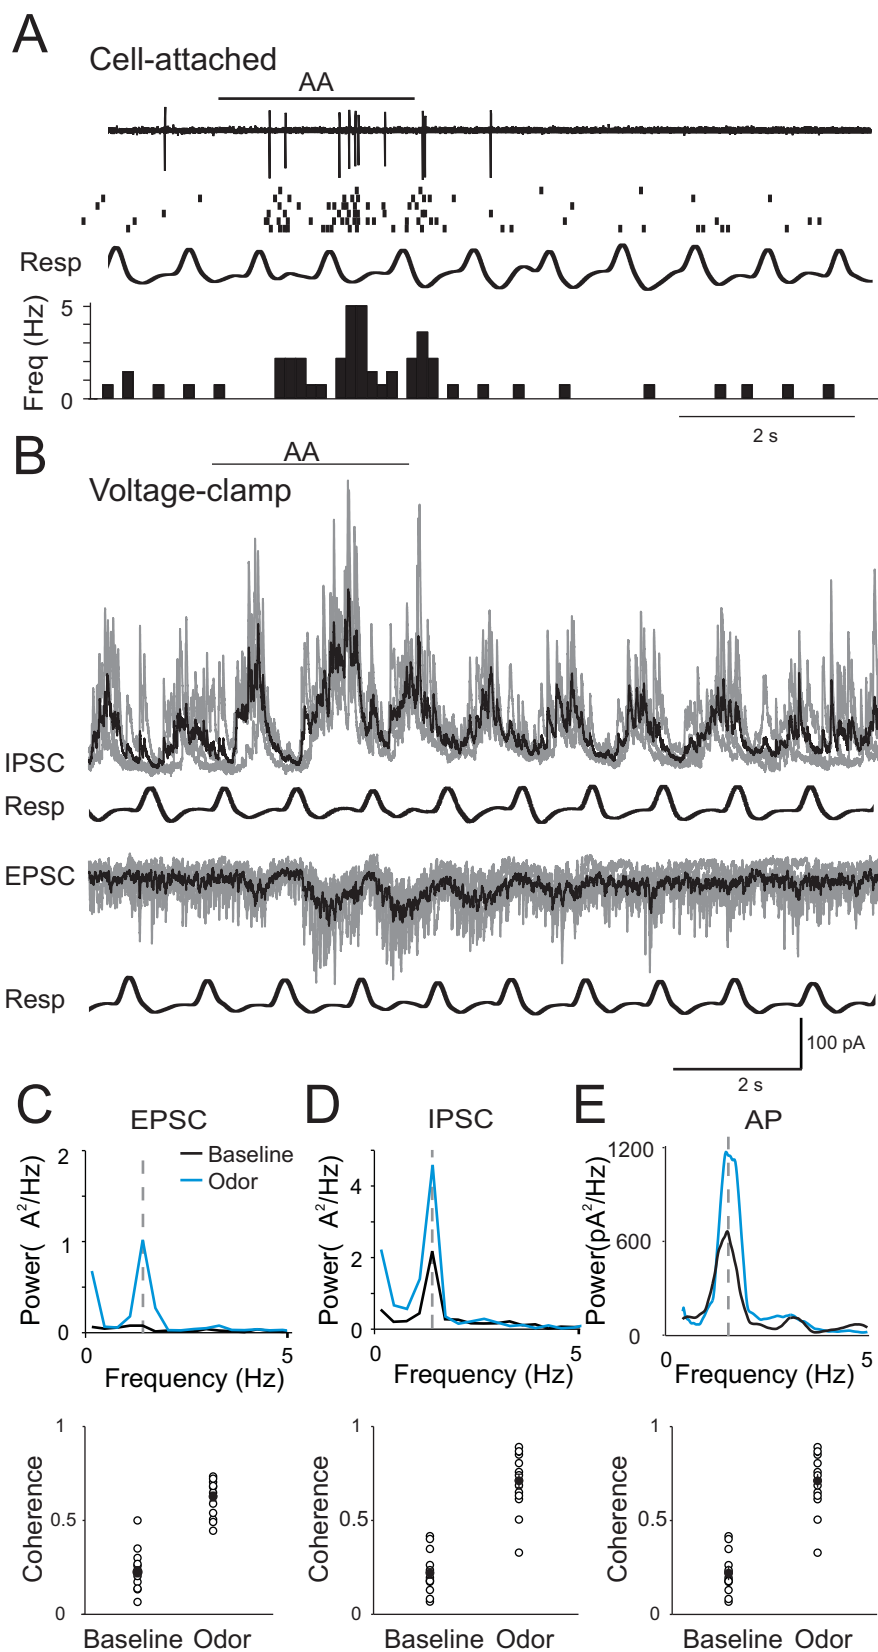

## Supplemental Fig. 2

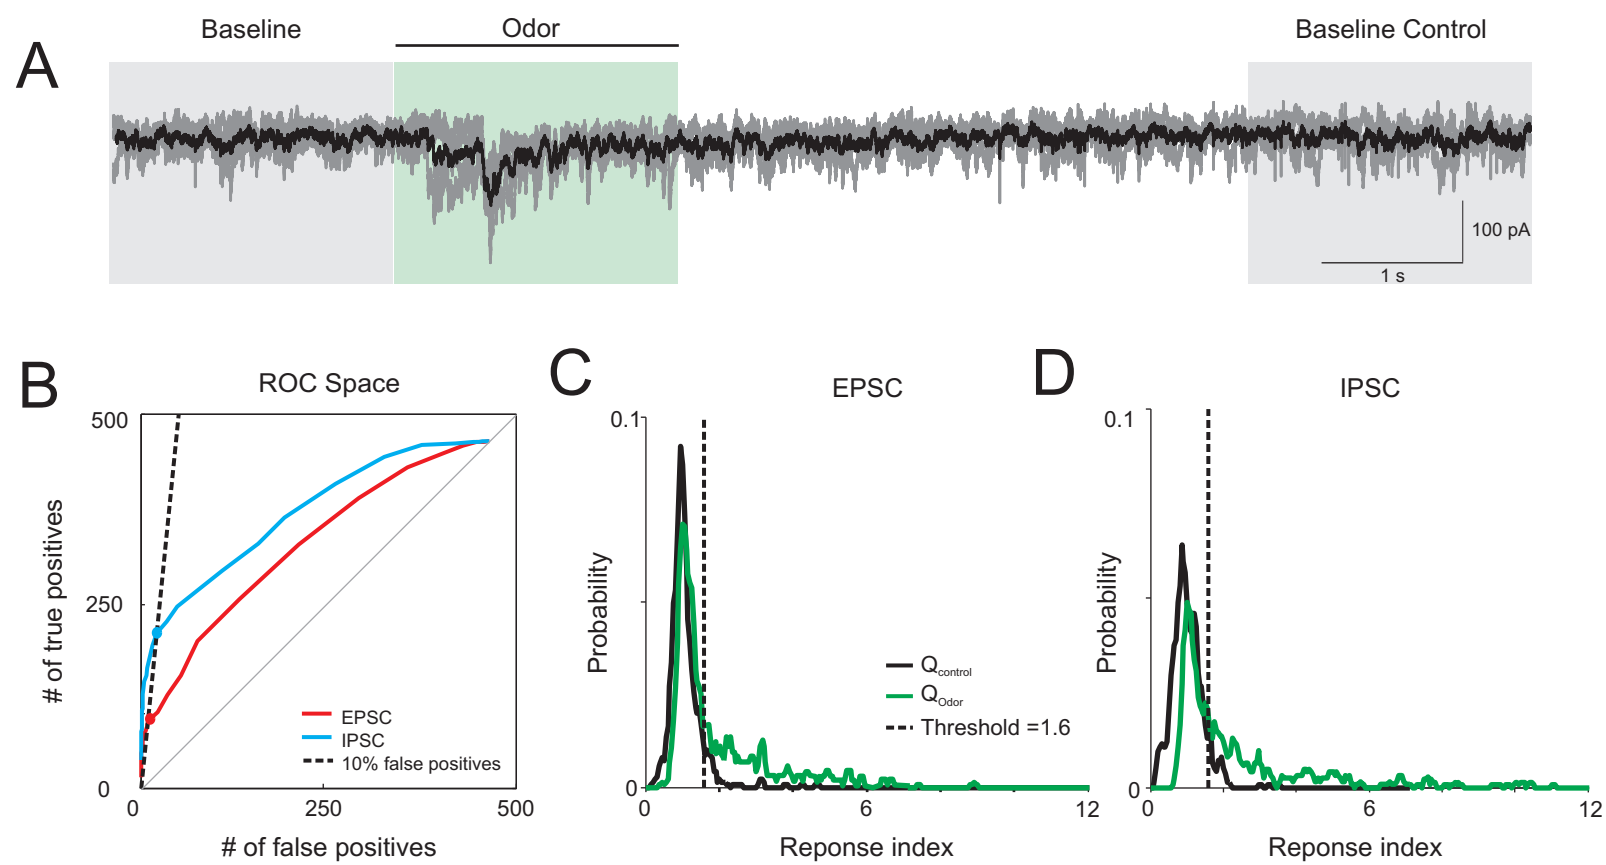

Supplement: NIHMS122684-supplement-01.pdf [file NIHMS122684-supplement-01.pdf]
